# Supplementary material for: Targeting PIKfyve-driven lipid homeostasis as a metabolic vulnerability in pancreatic cancer
Source: PubMed Central journal article supplement (PMC10983929; doi:10.1101/2024.03.18.585580), 2024-03-20

**A**

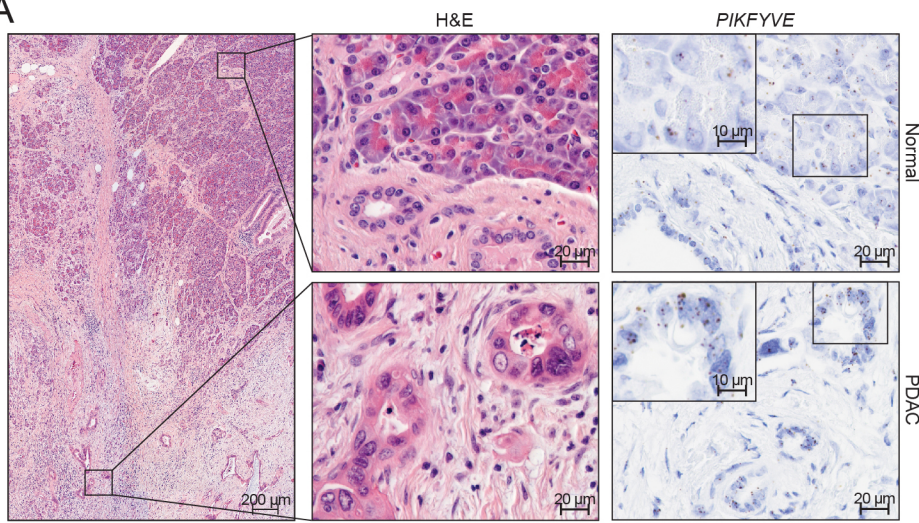

**B**

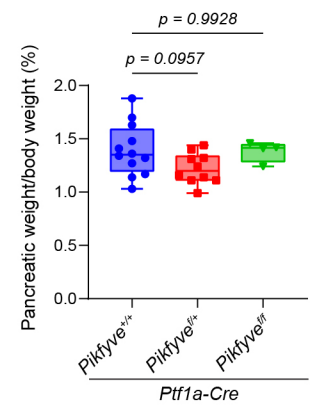

**C**

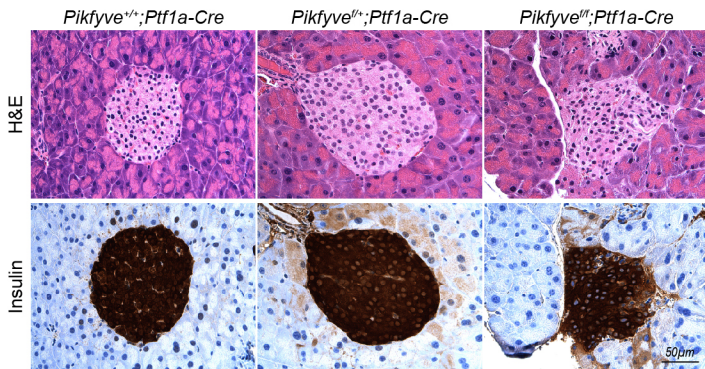

**D**

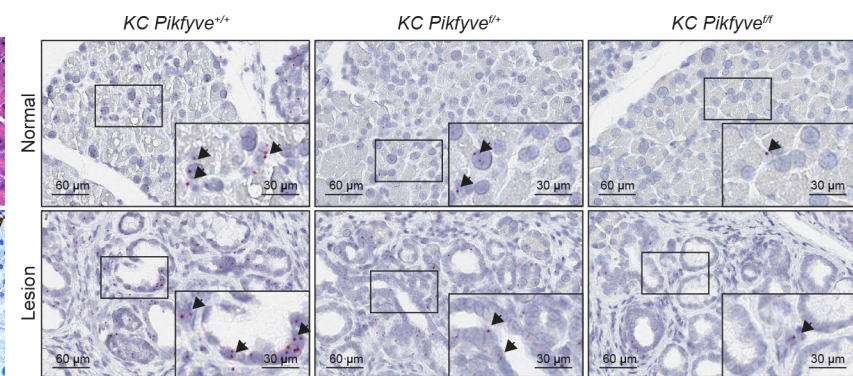

**E**

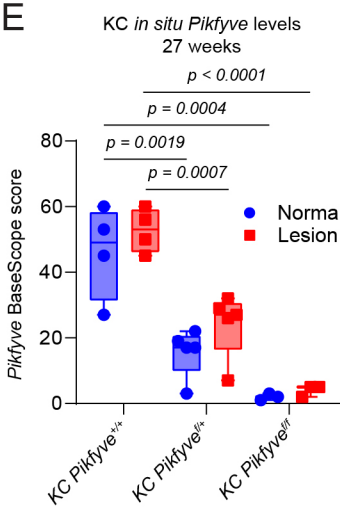

**F**

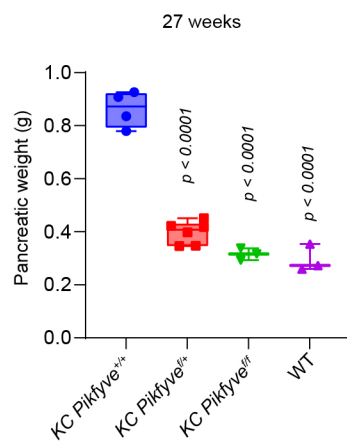

**G**

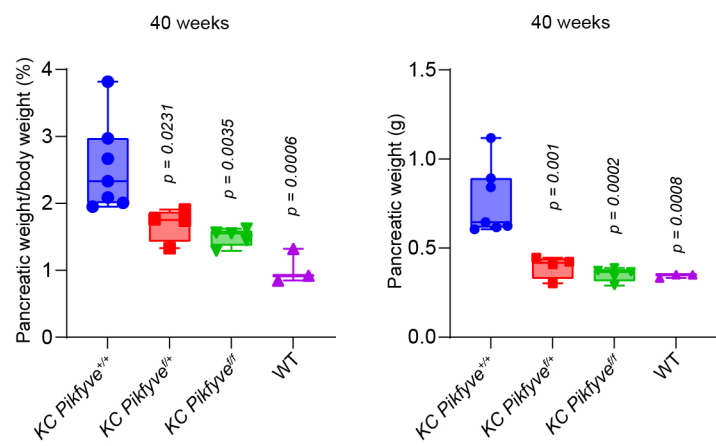

**H**

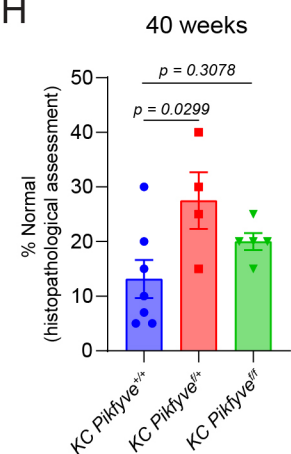

**I**

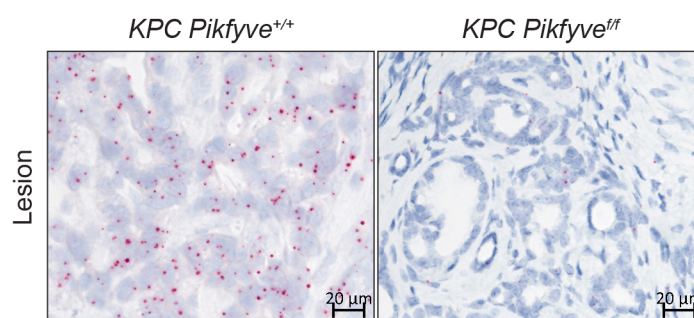

**J**

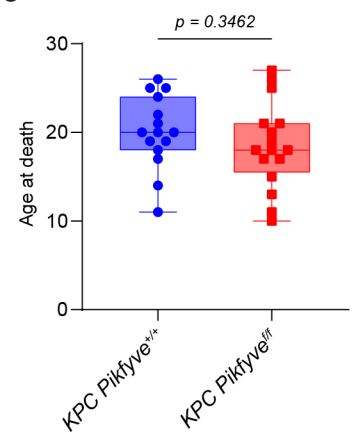

**A**

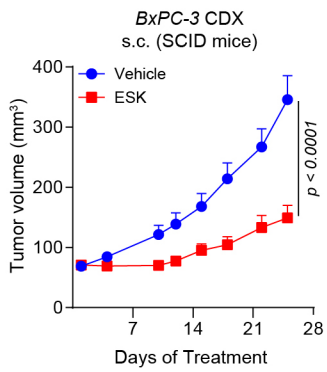

**B**

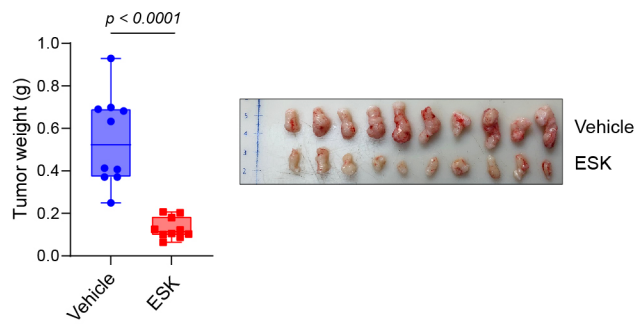

**C**

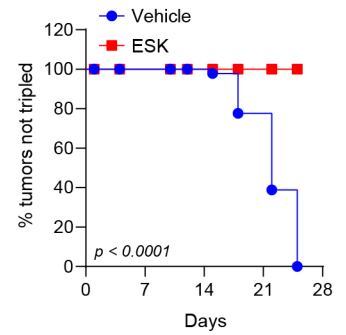

**D**

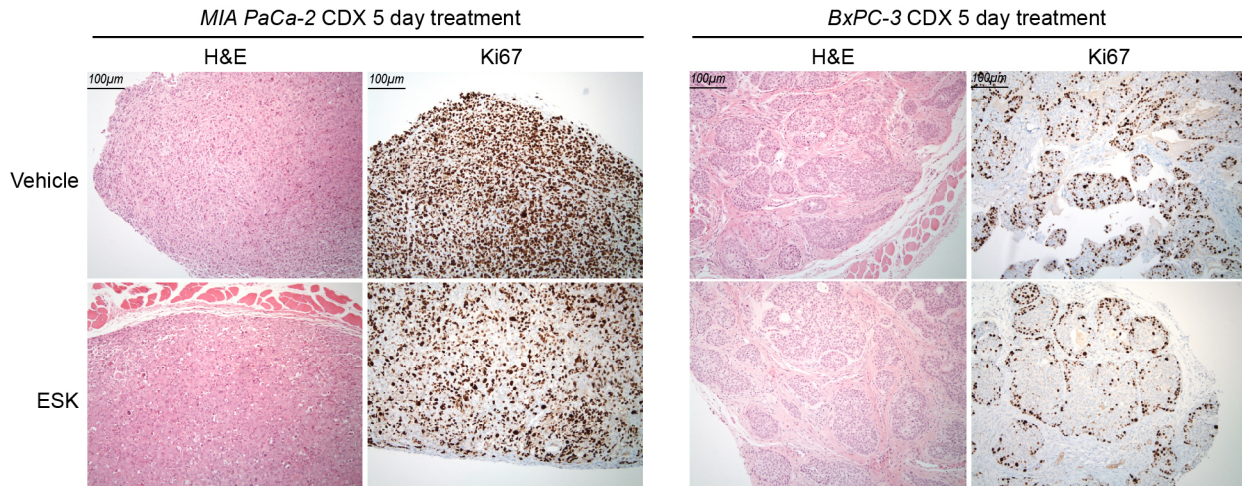

**E**

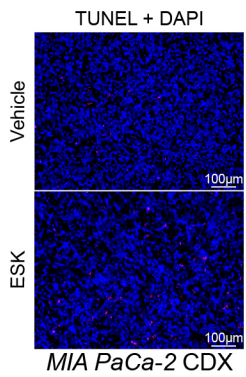

**F**

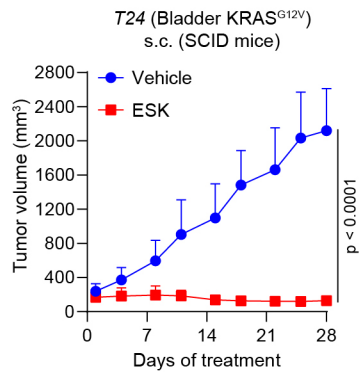

**G**

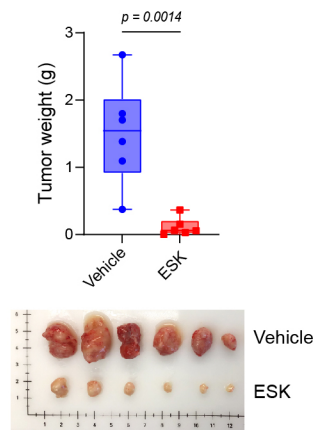

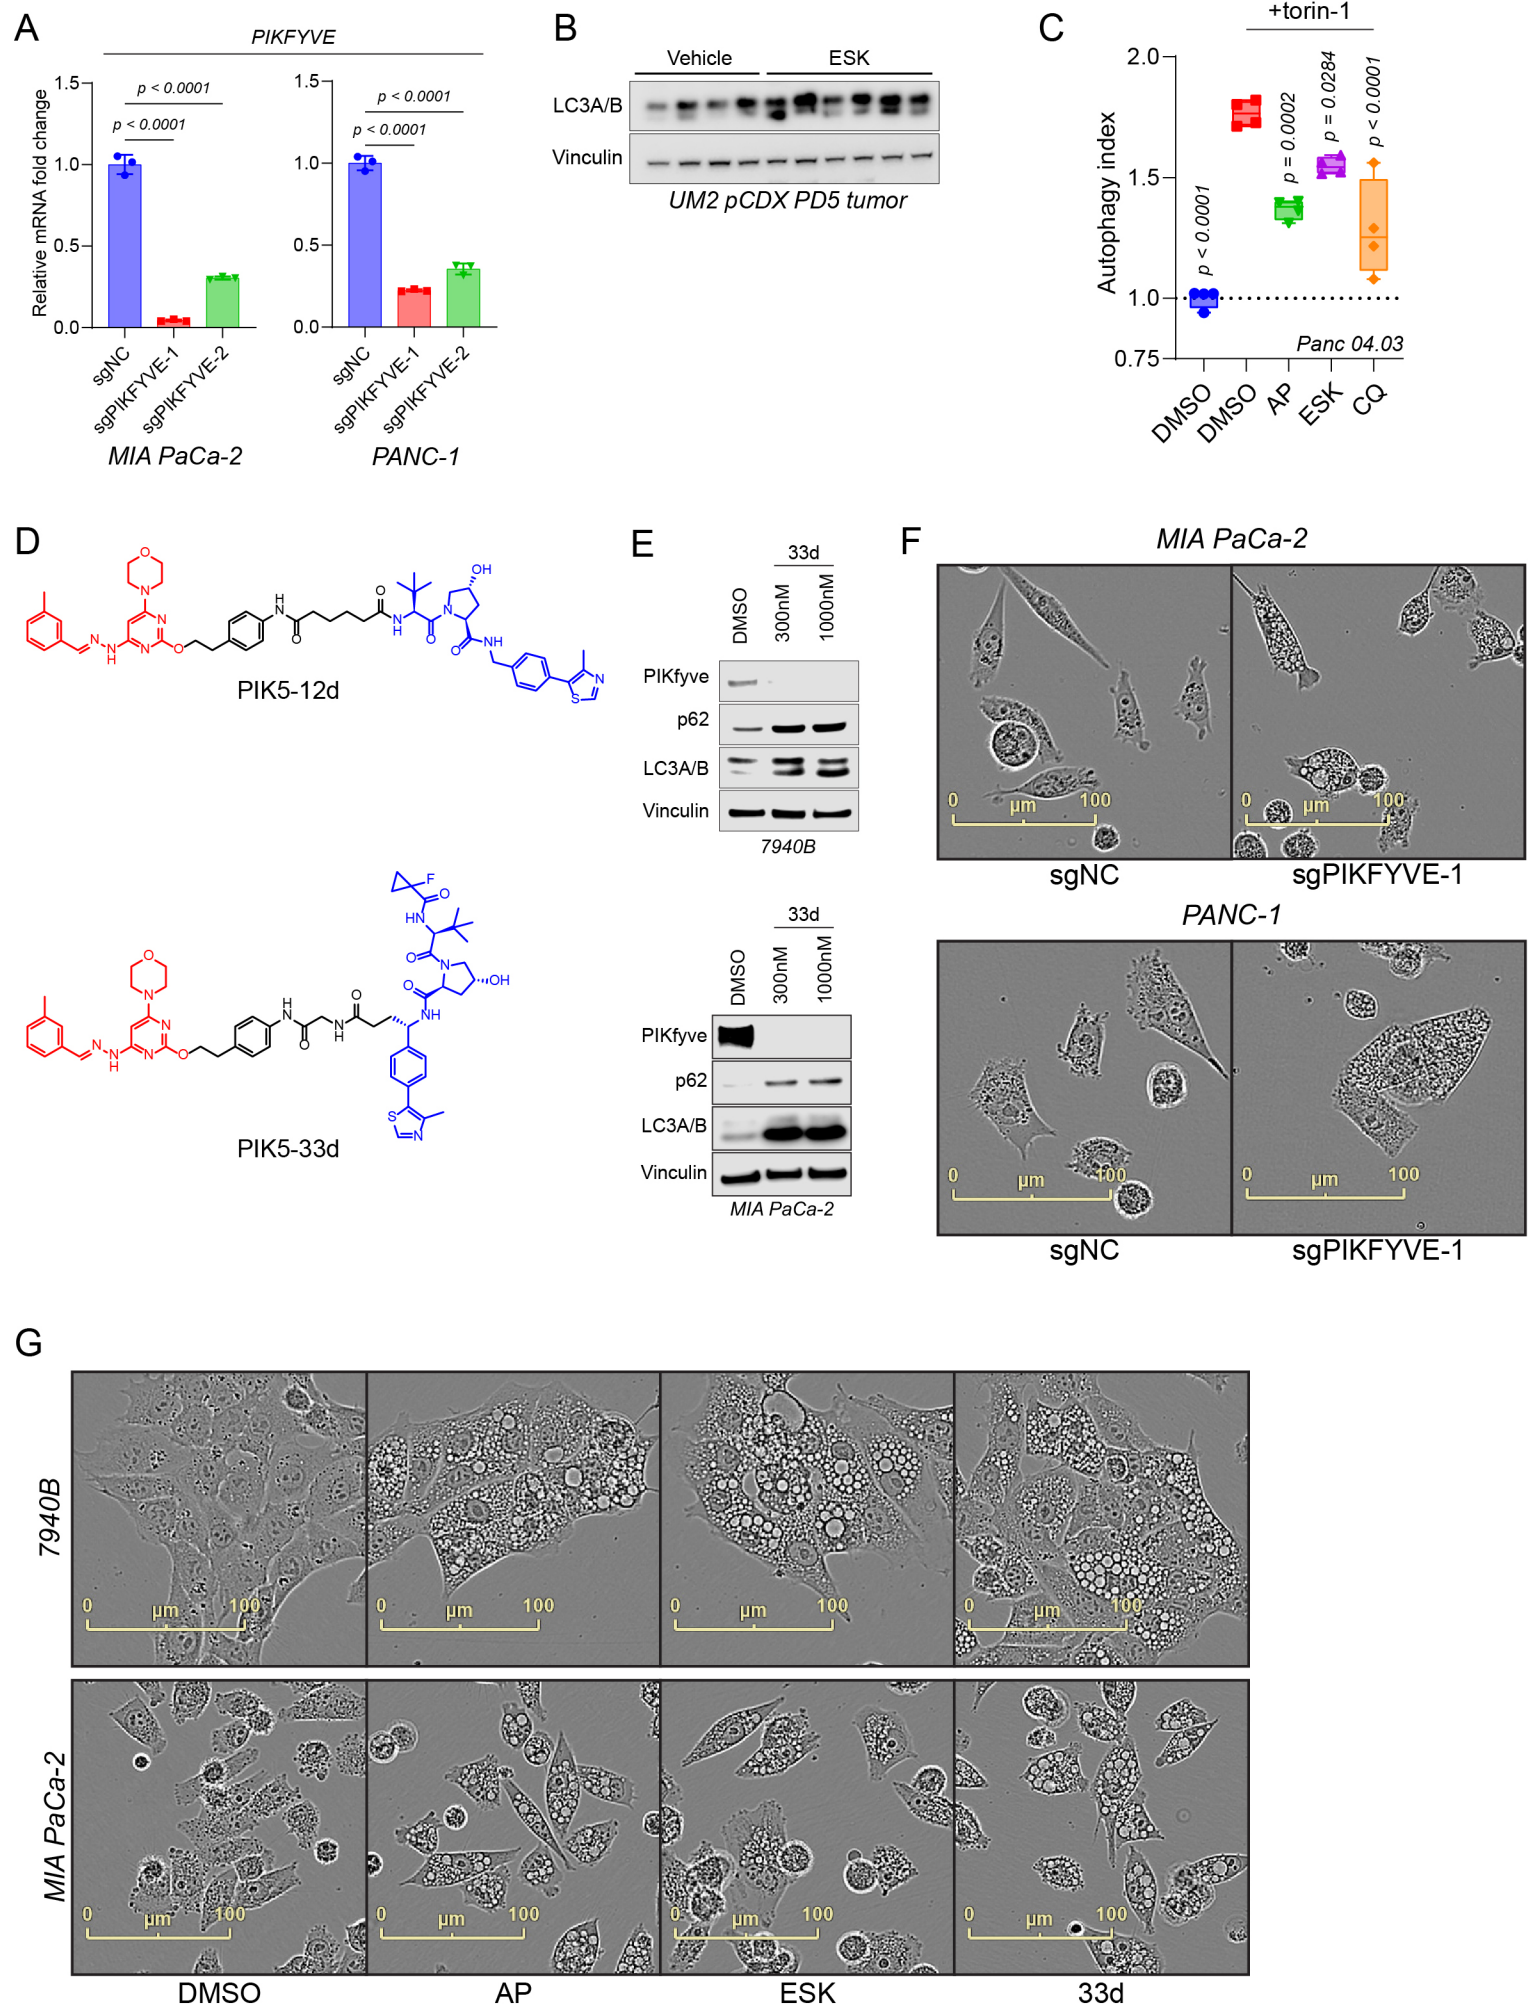

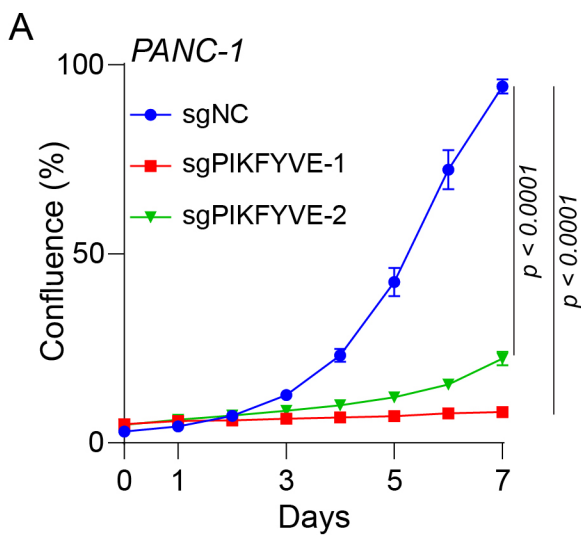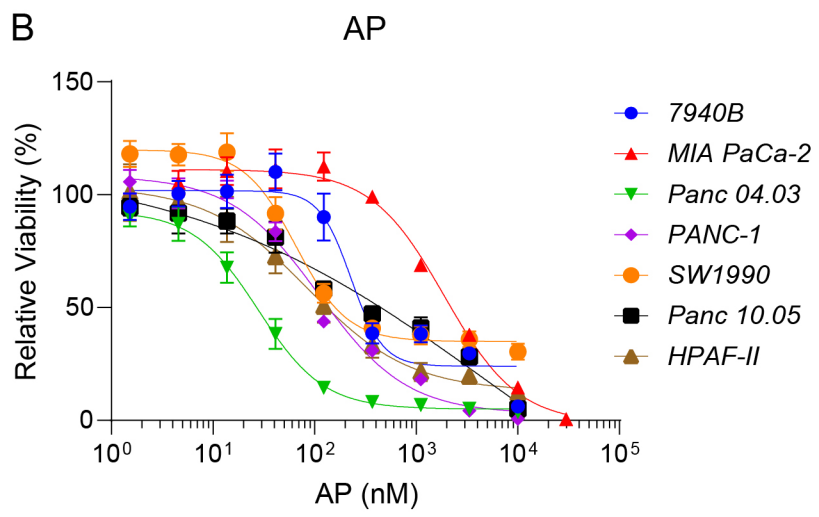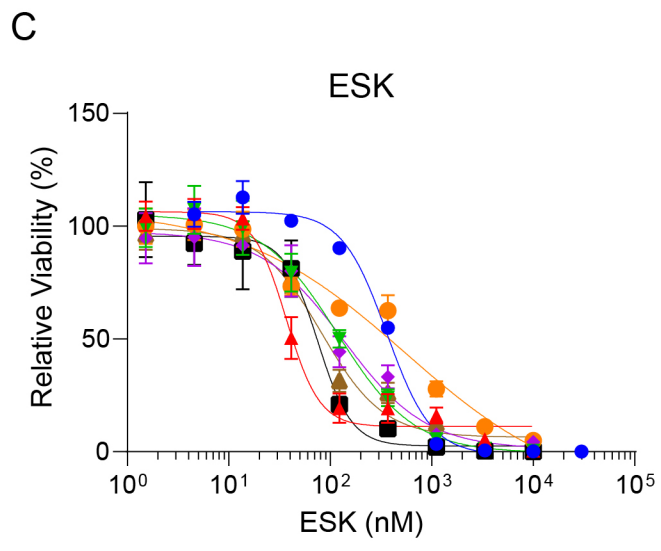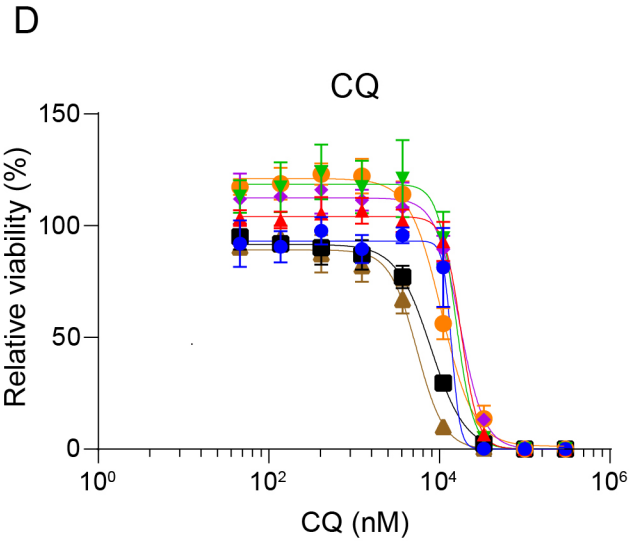

**E**

|                   | AP (nM) | ESK (nM) | CQ (nM) |
|-------------------|---------|----------|---------|
| <i>KPC-7940B</i>  | 228.6   | 361.4    | 13893   |
| <i>MIA PaCa-2</i> | 1902    | 36.95    | 18019   |
| <i>Panc 04.03</i> | 27.97   | 117.8    | 15414   |
| <i>PANC-1</i>     | 110.4   | 135.3    | 17306   |
| <i>SW 1990</i>    | 65.19   | 554.7    | 10641   |
| <i>Panc 10.05</i> | 4960    | 75.22    | 7913    |
| <i>HPAF-II</i>    | 85.82   | 81.96    | 5446    |

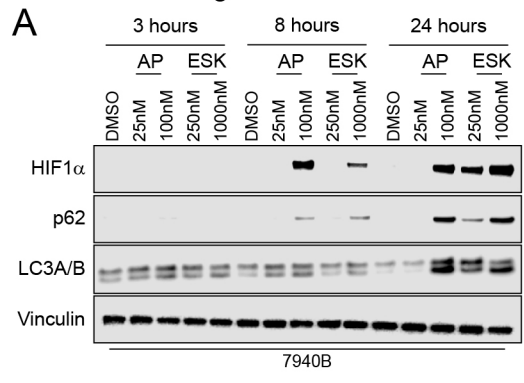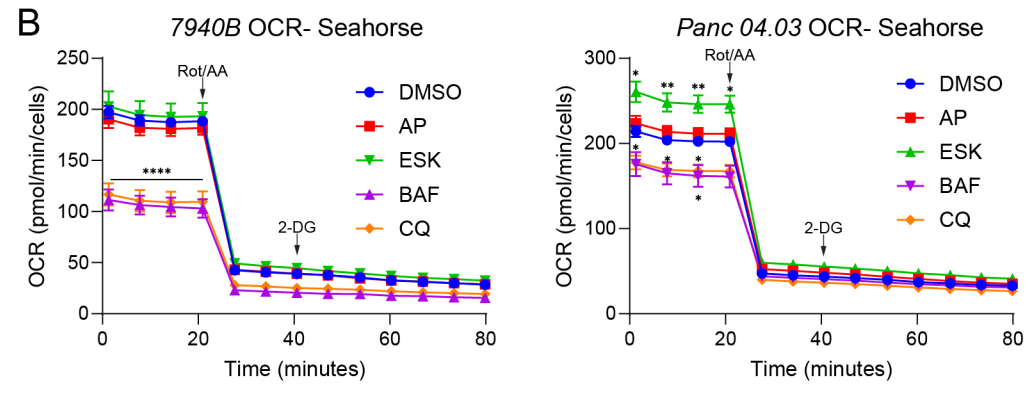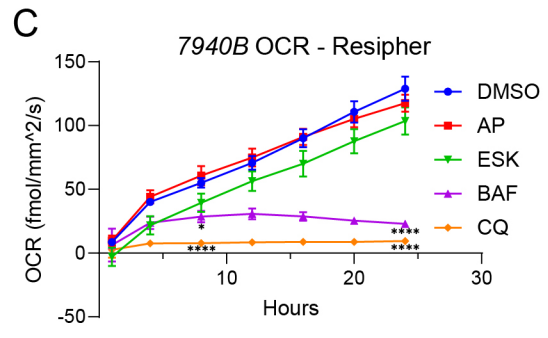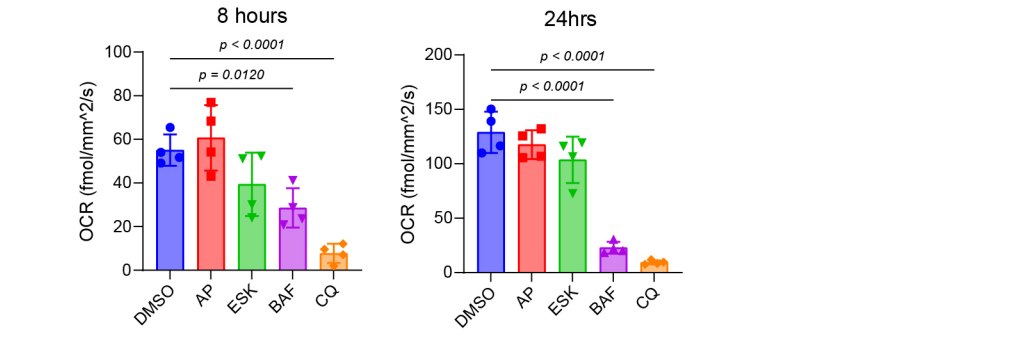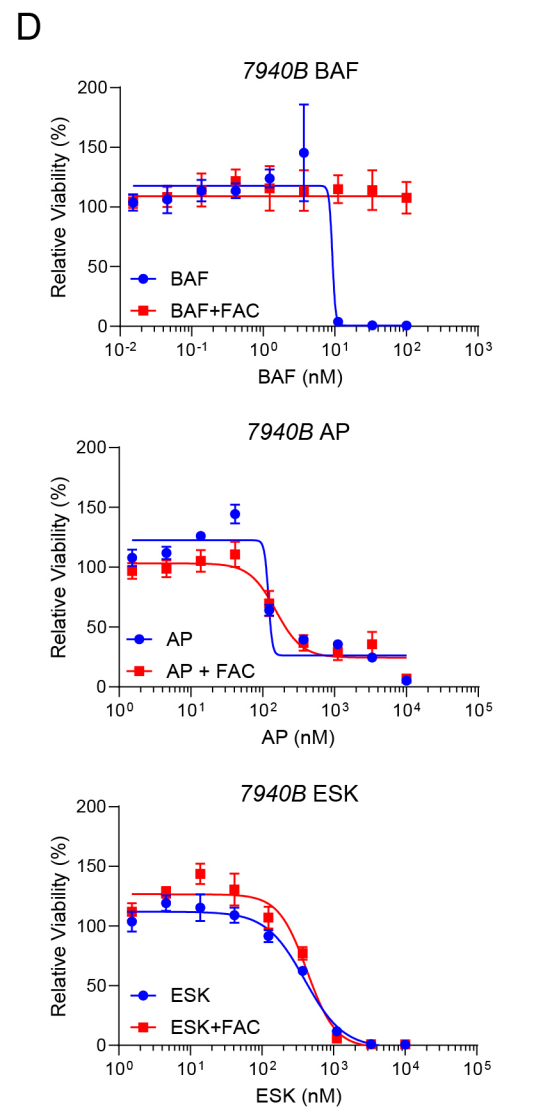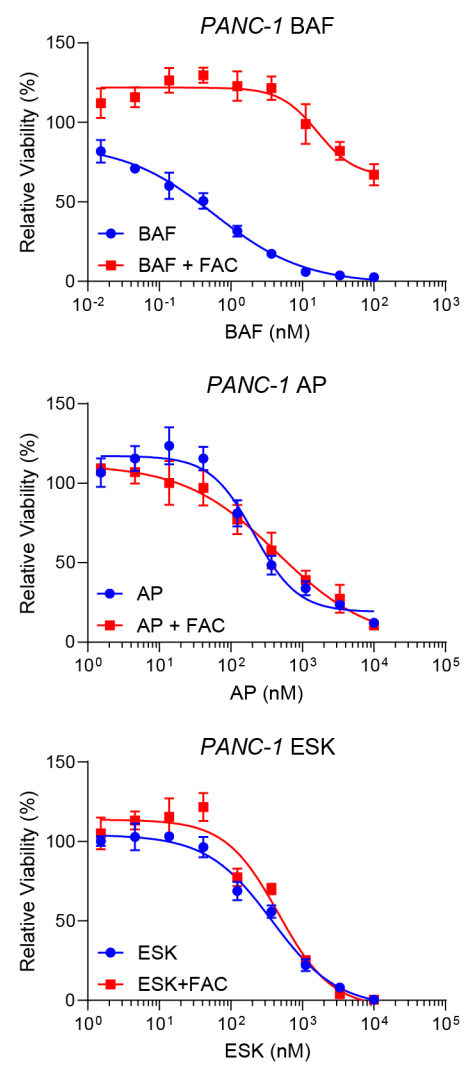

**E**

Half-maximal inhibitory concentration (IC<sub>50</sub>)

| 7940B | -FAC  | +FAC  |
|-------|-------|-------|
| BAF   | 9.241 | N/A   |
| AP    | 120.1 | 151.8 |
| ESK   | 395.7 | 425.9 |

  

| PANC-1 | -FAC   | +FAC  |
|--------|--------|-------|
| BAF    | 0.5775 | 16.3  |
| AP     | 210.7  | 449.8 |
| ESK    | 377.4  | 464.3 |

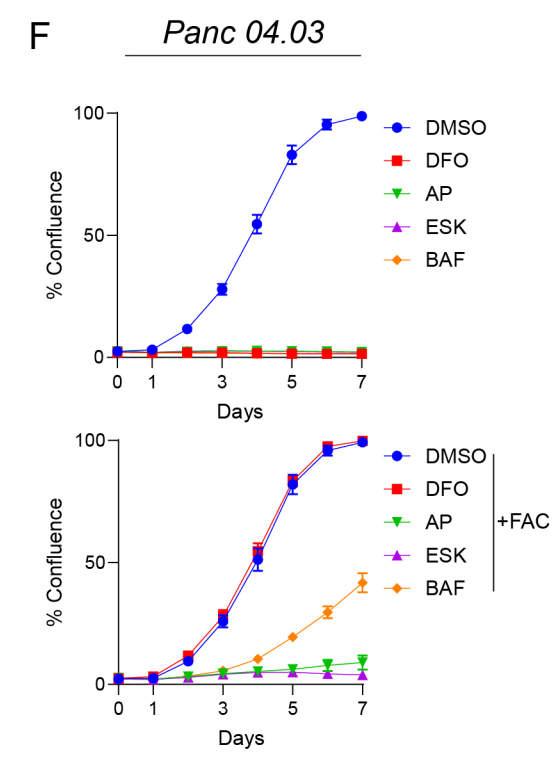

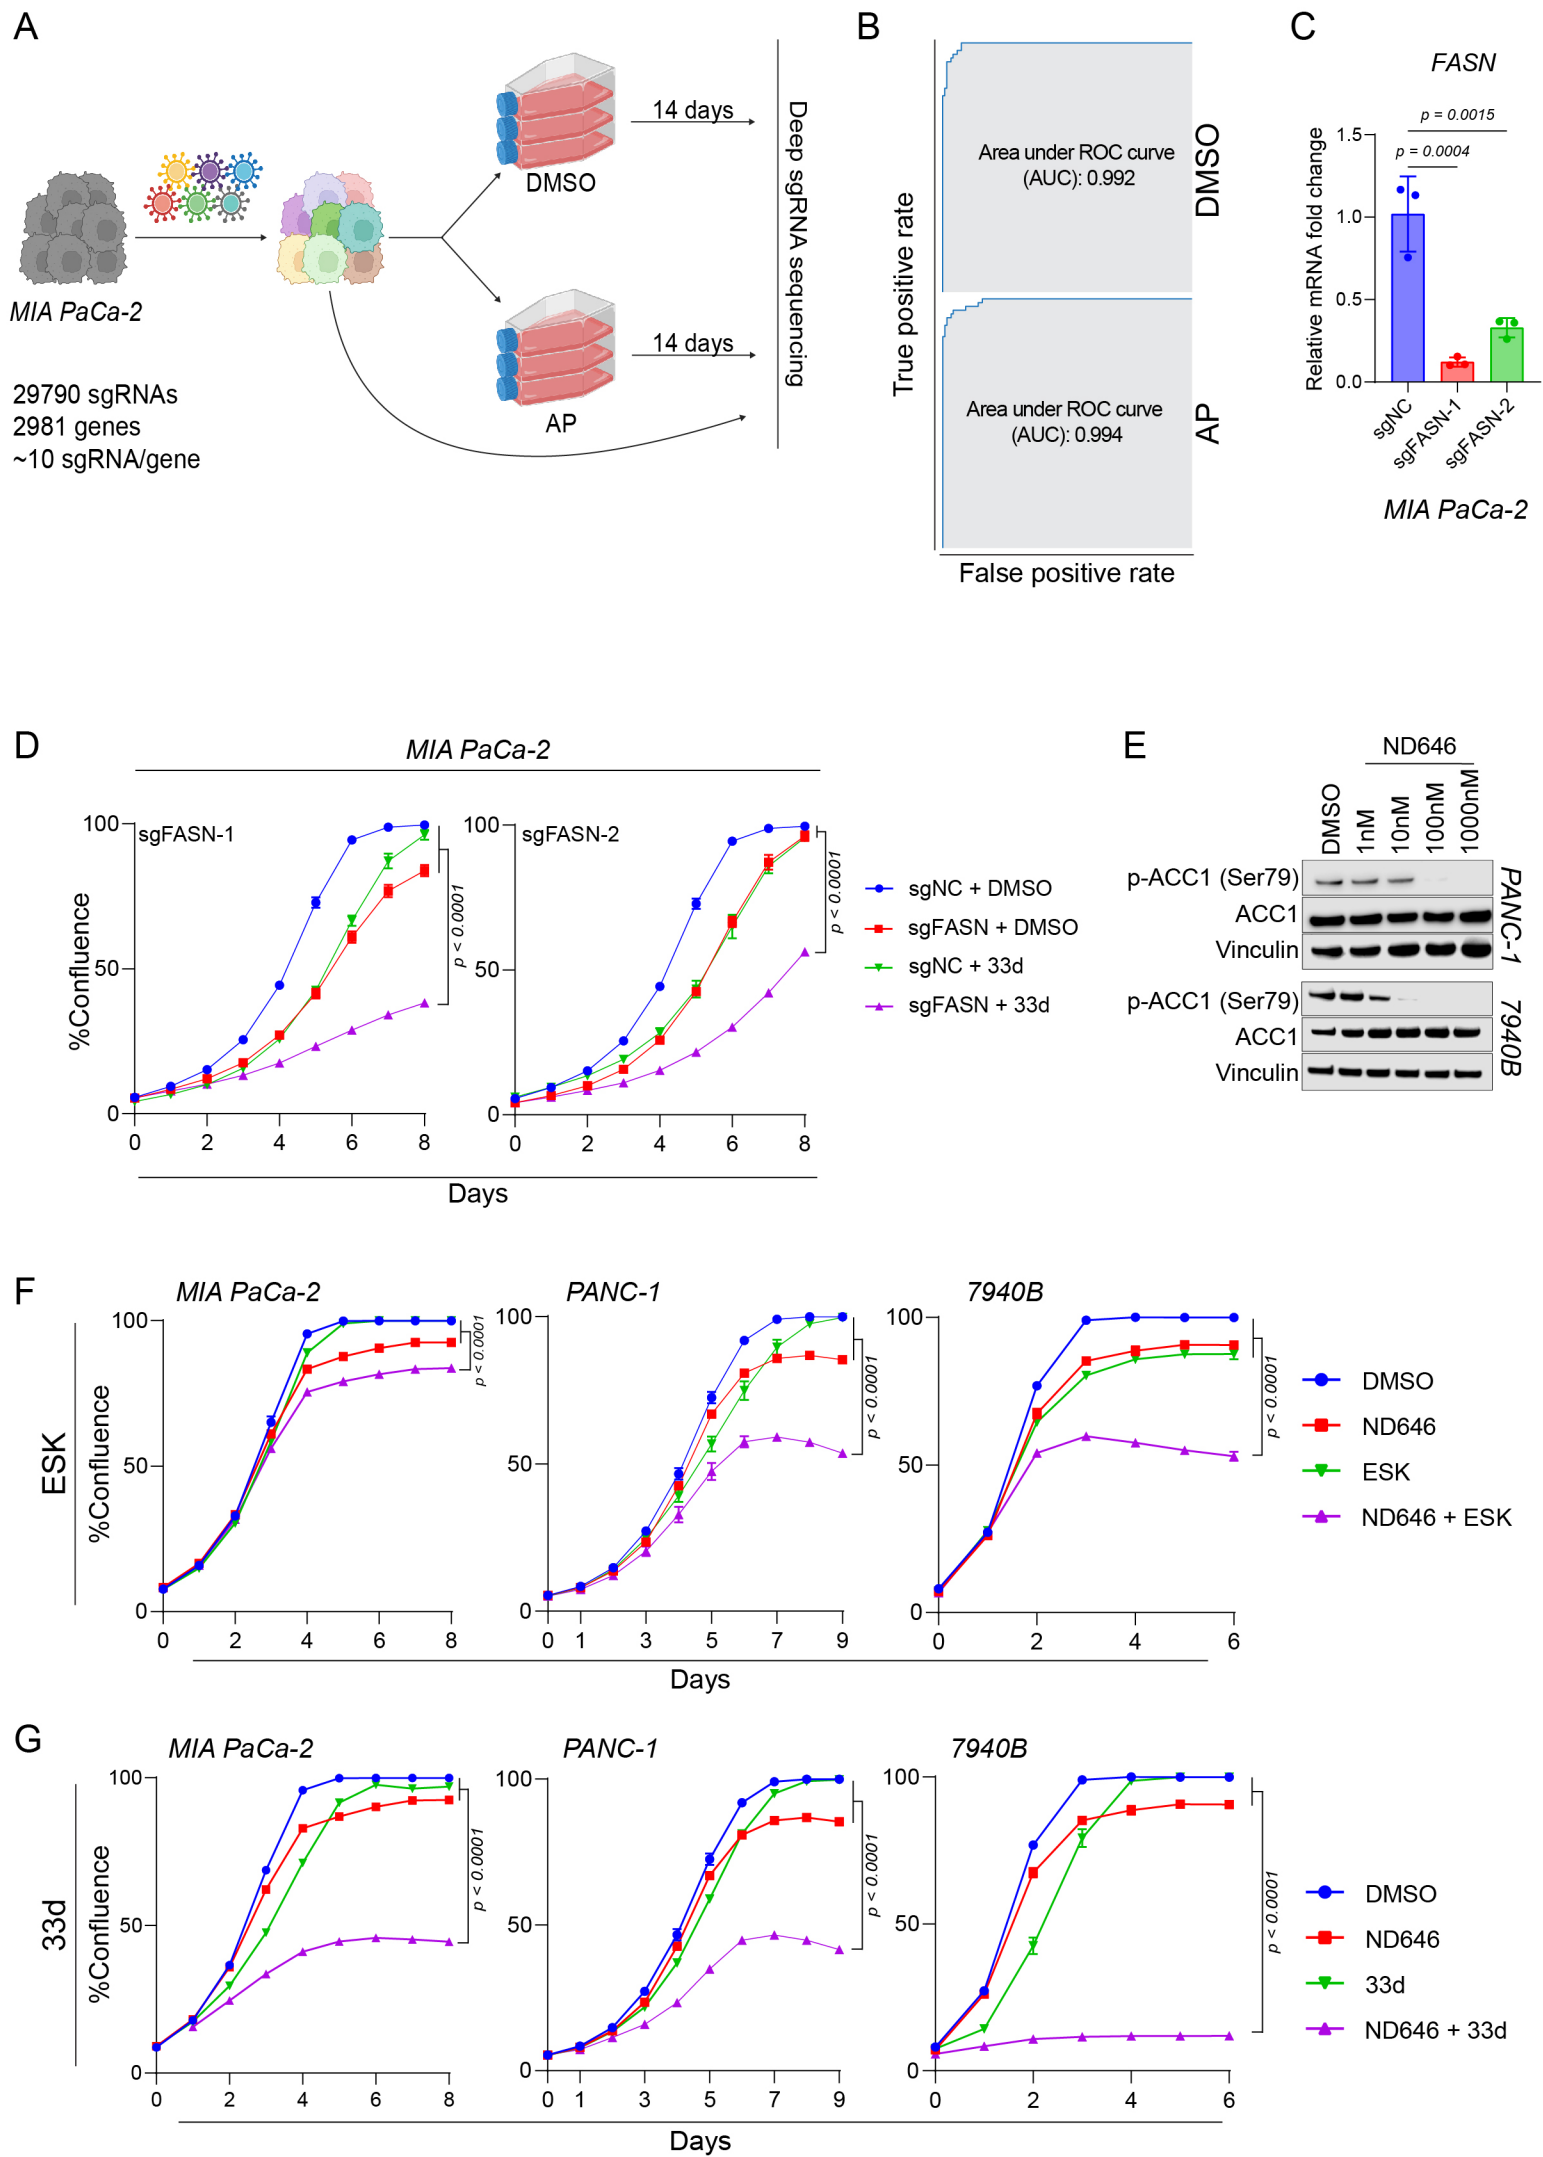

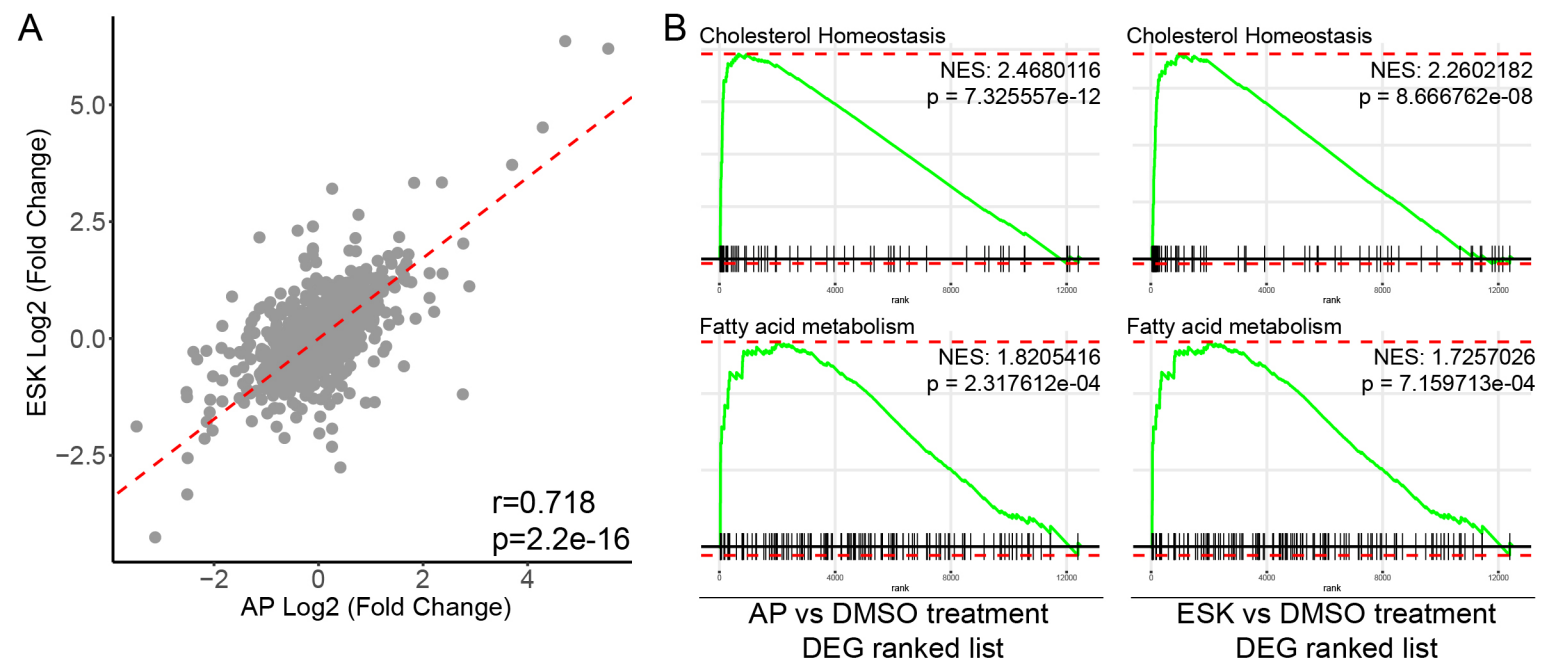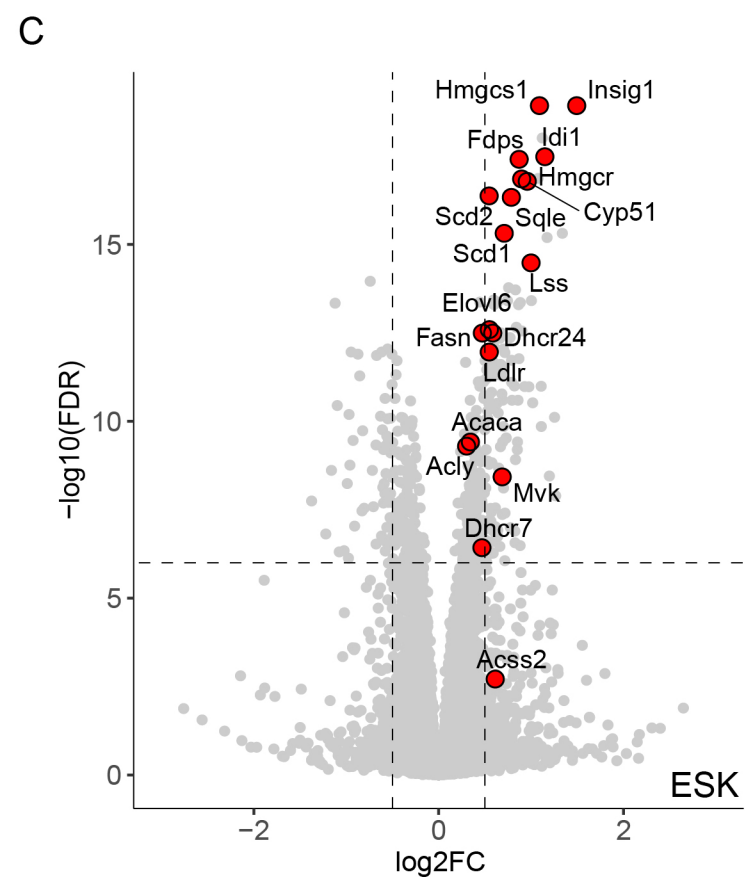

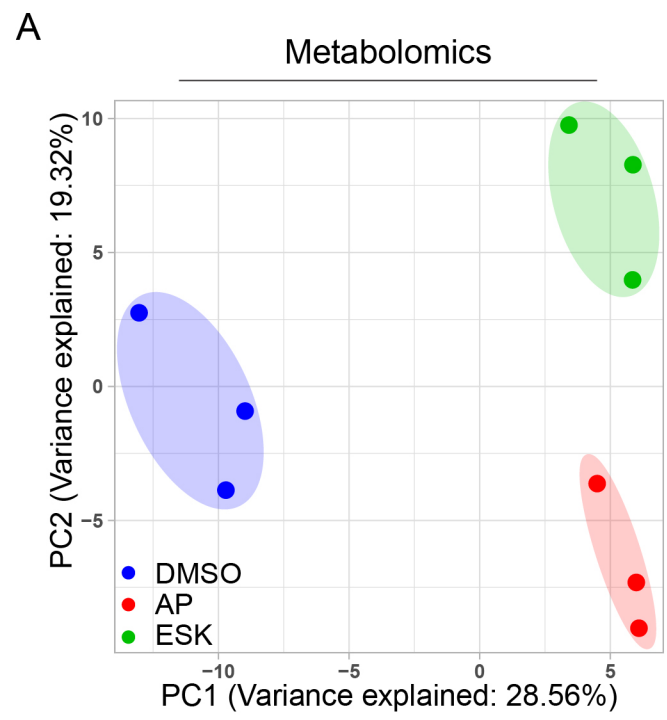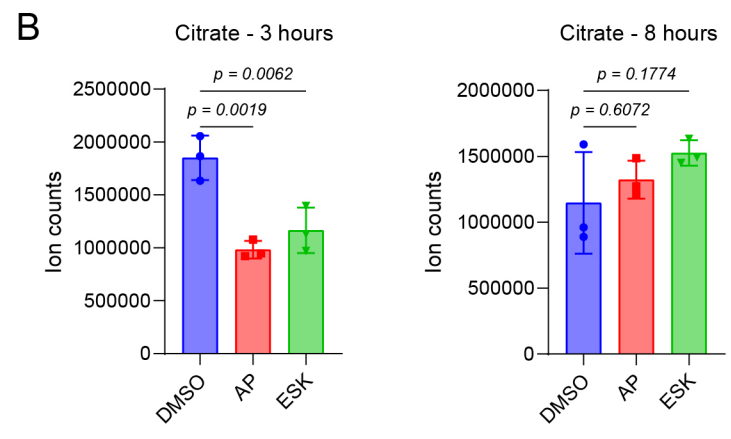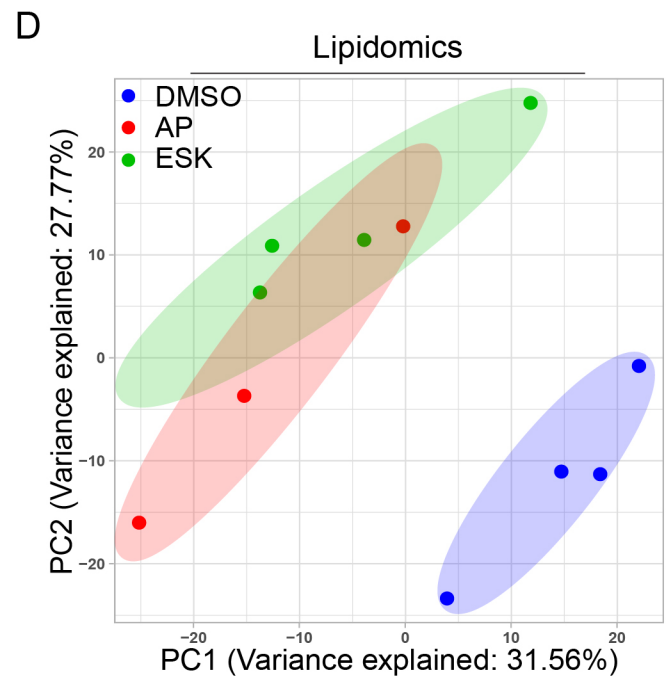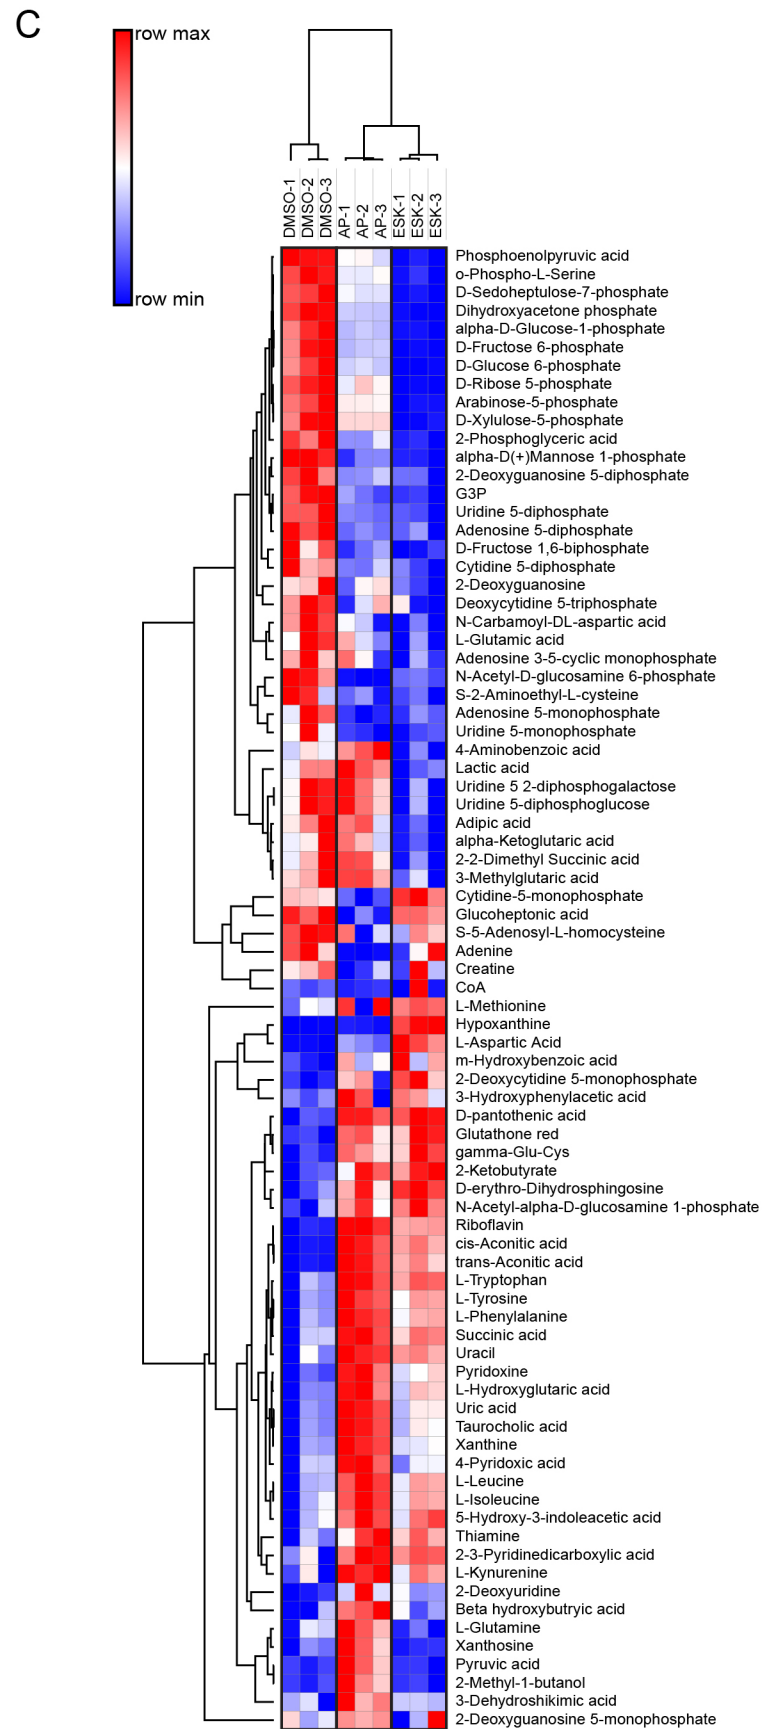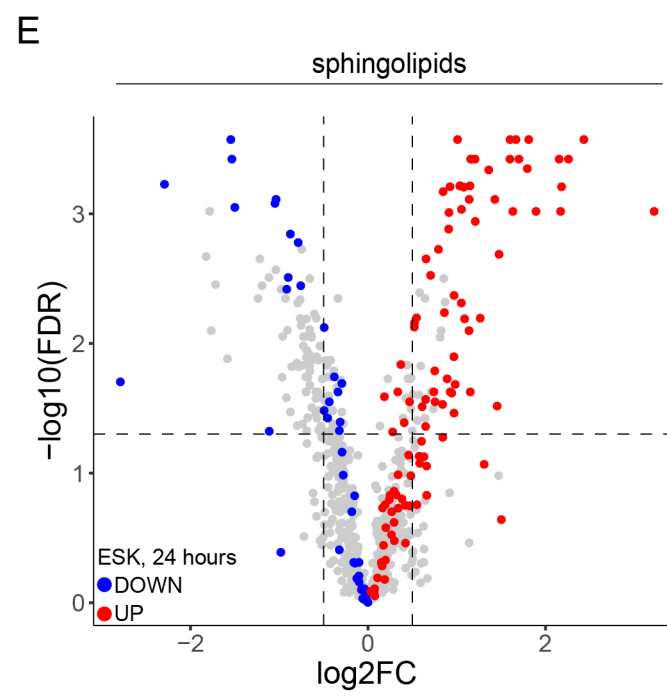



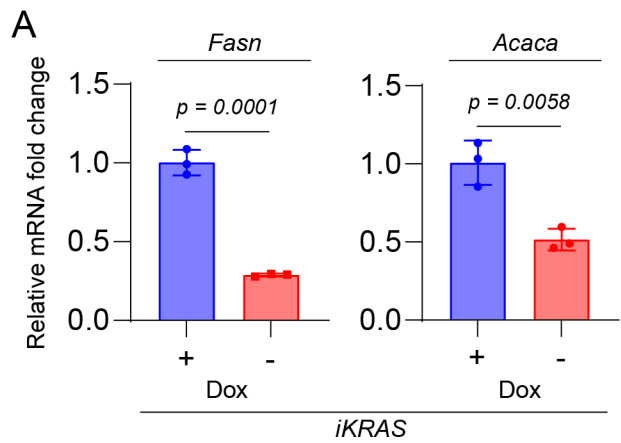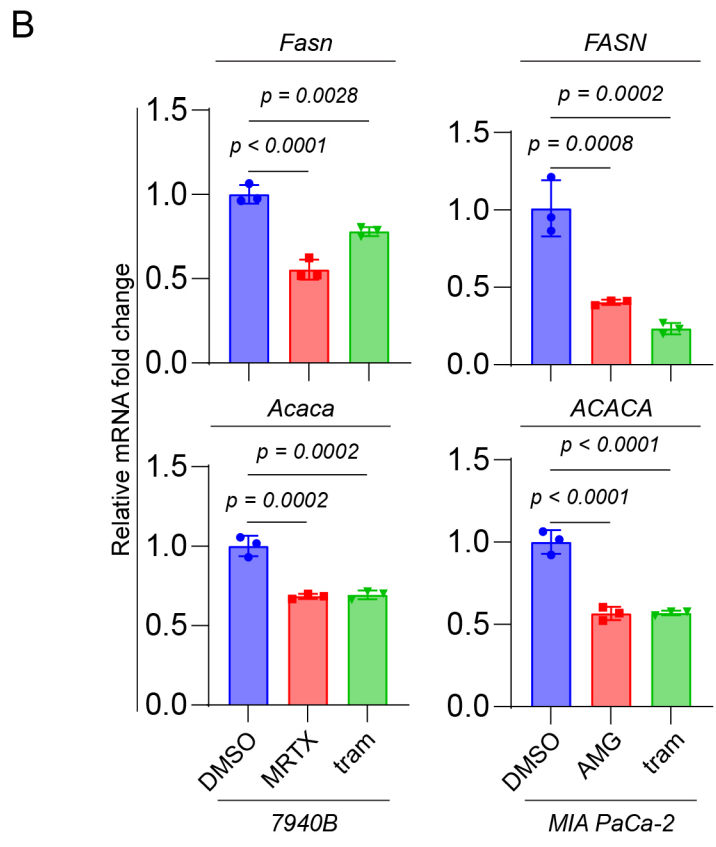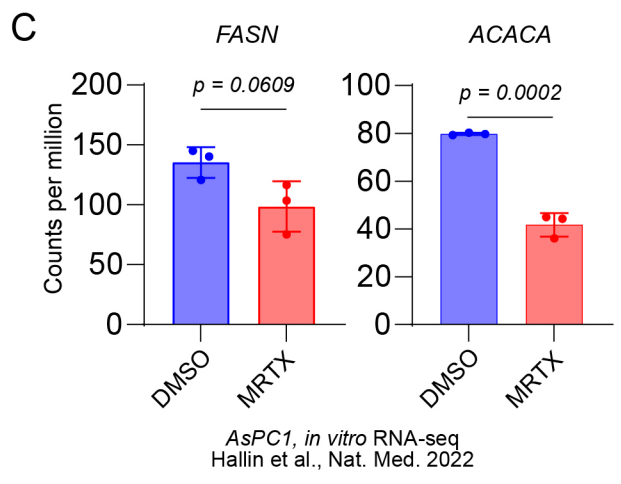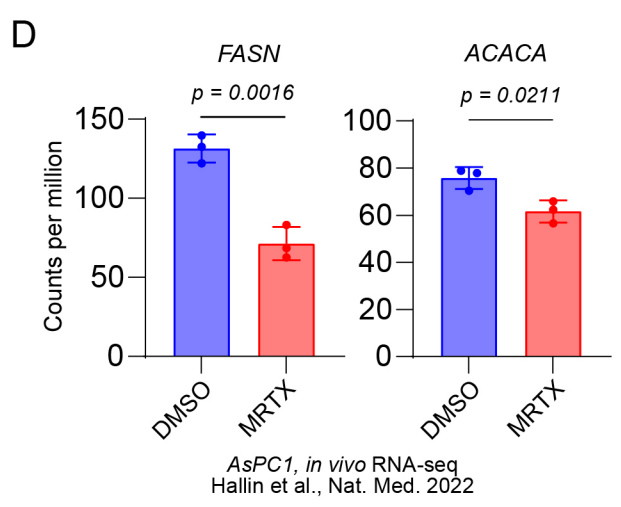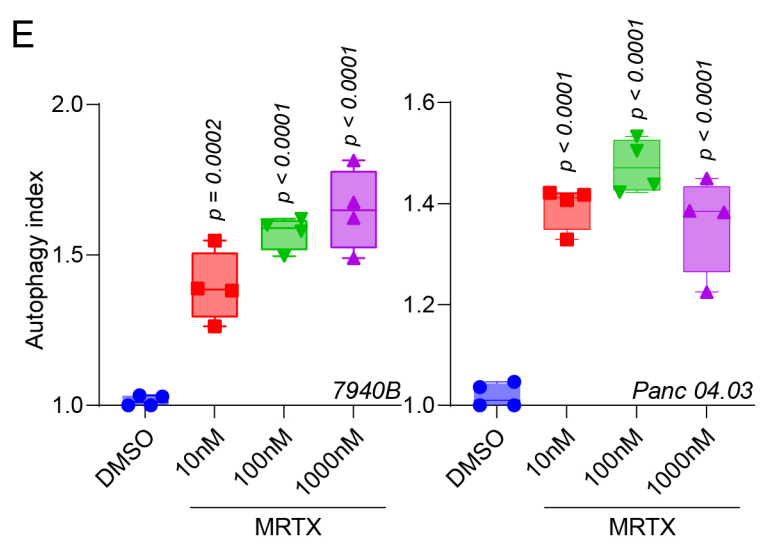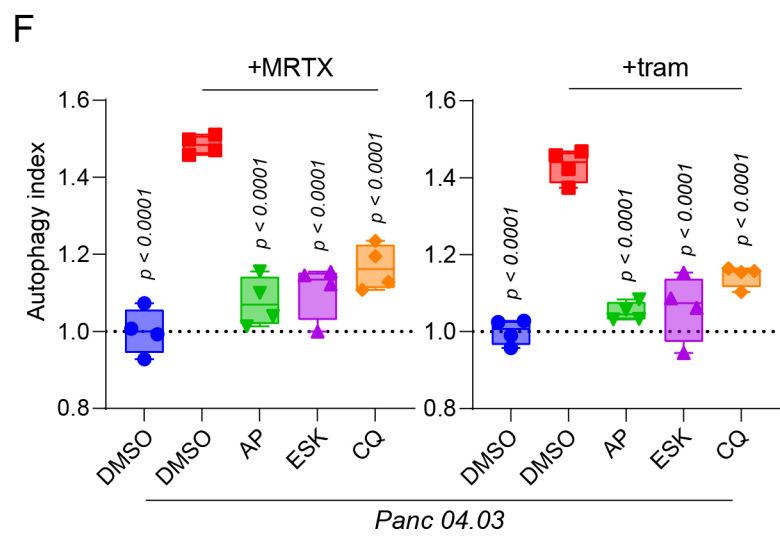

A

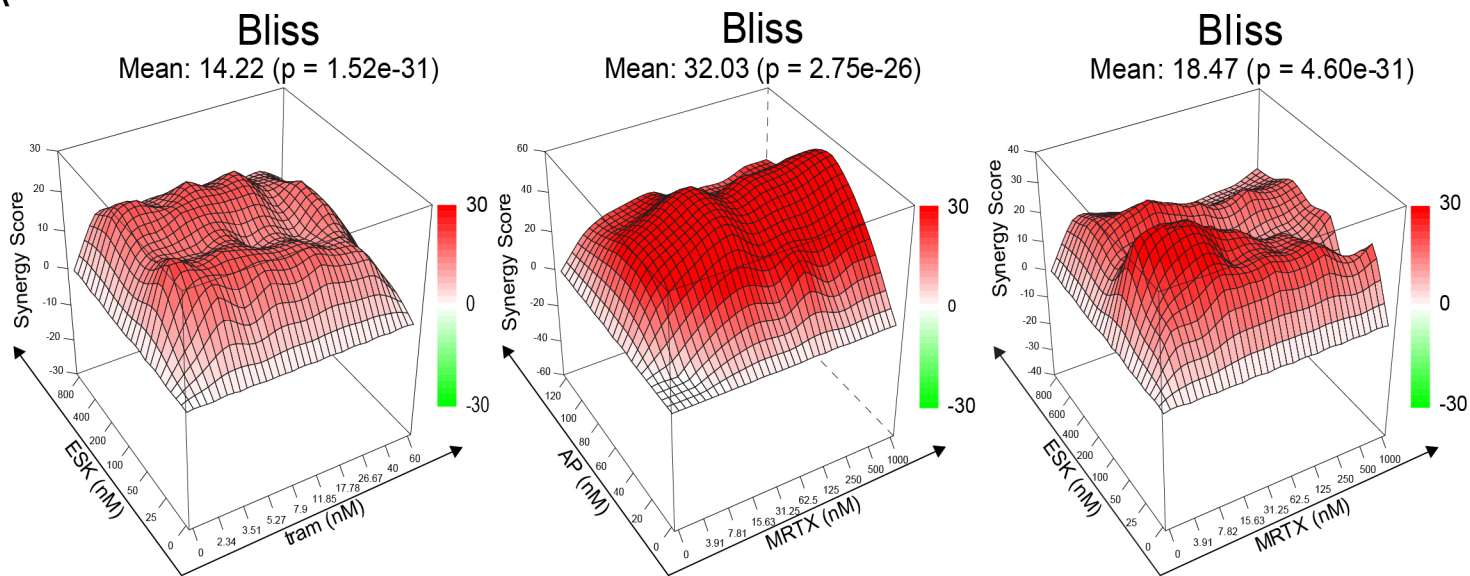

7940B

B

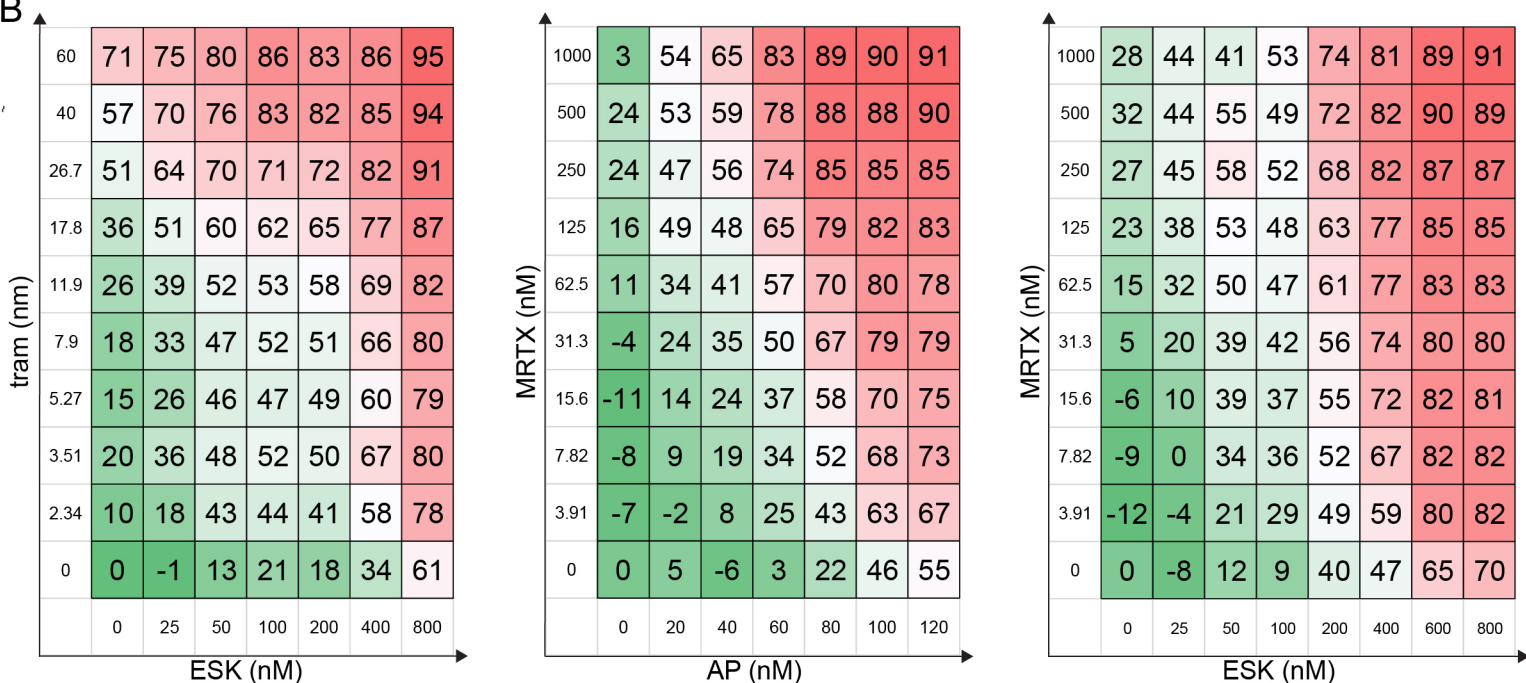

7940B

C

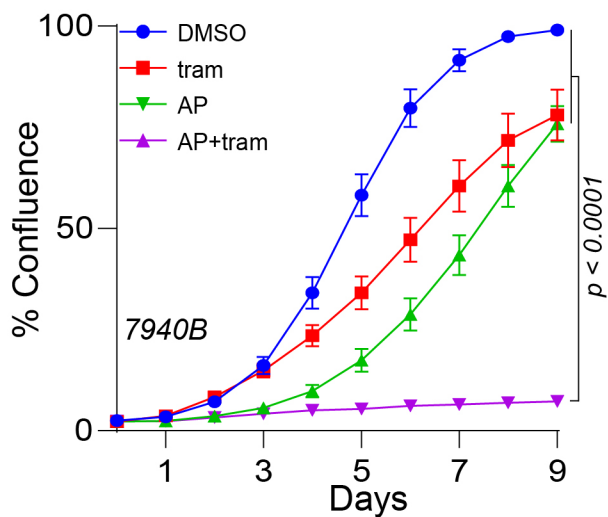

A

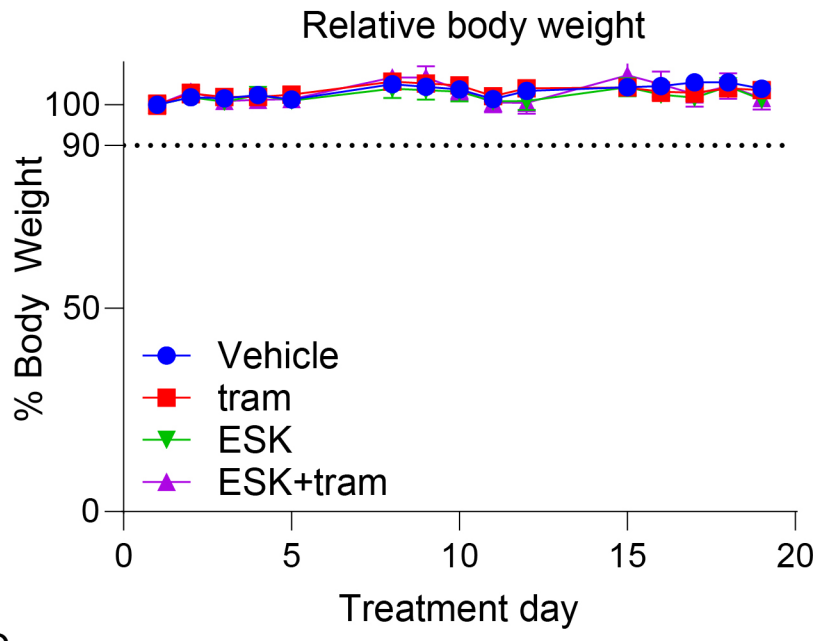

B

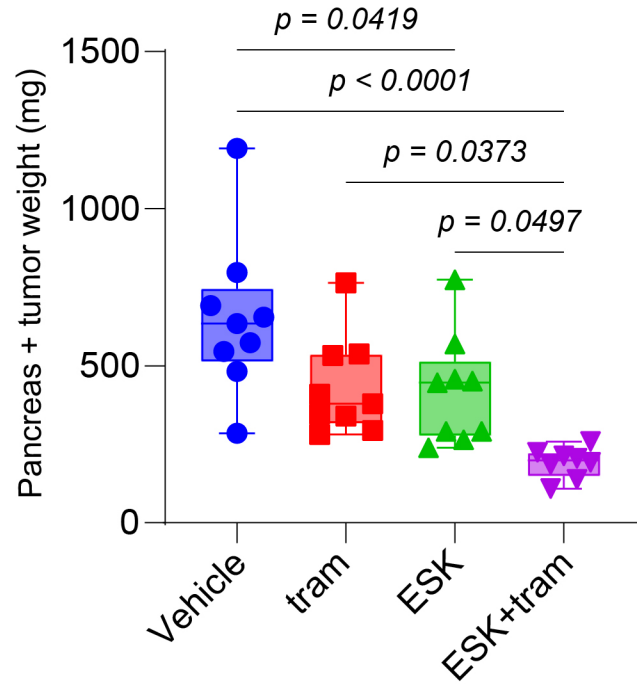

C

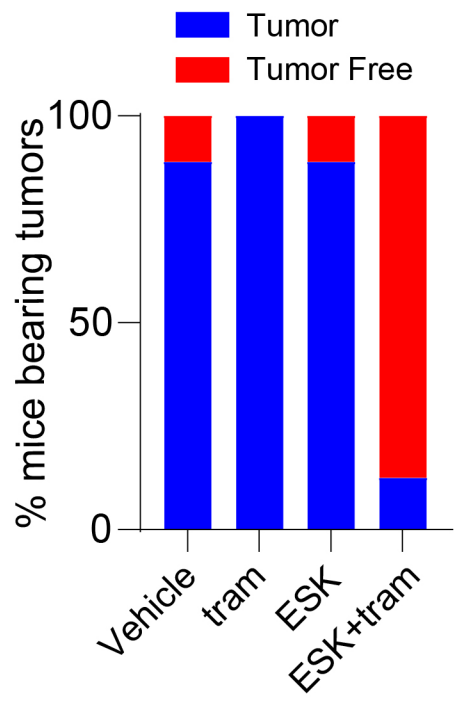

Supplement: media-1.pdf [file media-1.pdf]
